# Supplementary material for: Naphthalimides as anti-cancer agents: systematic synthesis and biological activity along with their encapsulated G0.5 PAMAM dendrimer nanoparticles
Source: Royal Society of Chemistry journal article supplement (doi:10.1039/d4nj02244k), 2024-01-01
Supplement: d4nj02244k1.pdf [file d4nj02244k1.pdf]

# **Naphthalimides as anti-cancer agents: Systematic synthesis and biological activity along with their encapsulated G0.5 PAMAM dendrimer nanoparticles**

Azita Noshirvani Sharifabad<sup>a</sup>, Alireza Khosravi<sup>a\*</sup>, Farshad H. Shirazi<sup>b,c</sup>, Hanieh Shaki<sup>d</sup>, Golrokh Farnam<sup>c</sup>, Hamid Reza Moghimi<sup>e</sup>, Farzad Kobarfard<sup>f\*</sup>

- a Department of Colour and Polymer Engineering, Amirkabir University of Technology (Tehran Polytechnic), Tehran, Iran.  
Email: [a.khosravi@aut.ac.ir](mailto:a.khosravi@aut.ac.ir)
- b Department of Toxicology and Pharmacology, Shahid Beheshti School of Pharmacy, Tehran, Iran.
- c Pharmaceutical Sciences Research Center, Shahid Beheshti University of Medical Sciences, Tehran, Iran.
- d Department of Polymer Engineering, Faculty of Engineering, Golestan University, Gorgan, Iran.
- e Department of Pharmaceutics and Nanotechnology, Shahid Beheshti School of Pharmacy, Tehran, Iran.
- f Department of Medicinal Chemistry, Shahid Beheshti School of Pharmacy, Tehran, Iran.  
Email: [kobarfard@sbmu.ac.ir](mailto:kobarfard@sbmu.ac.ir)

## 1. HPLC Calibration curve data

A calibration curve was built with an exact quantity of each naphthalimide derivatives and Amonafide as reference and solubilized in H<sub>2</sub>O or acidified H<sub>2</sub>O using formic acid by analyzing standard solutions at concentration 46-704 μM. The regression equation and R<sup>2</sup> value of each naphthalimide derivative summarized in **Table S1**.

**Table S 1.** HPLC data for naphthalimide derivatives used as encapsulated drugs in G0.5 PAMAM nanoparticle

| Naphthalimide derivative | Time (min) | $\lambda_{\max}$ (nm) | R <sup>2</sup> | Regression equation    |
|--------------------------|------------|-----------------------|----------------|------------------------|
| <b>3</b>                 | 1.83       | 347                   | 0.9993         | $y = 1590x - 17825$    |
| <b>4a</b>                | 2.29       | 359                   | 0.9946         | $y = 4489.4x - 134111$ |
| <b>4b</b>                | 2.32       | 380                   | 0.9905         | $y = 3677.8x - 35947$  |
| <b>4c</b>                | 3.18       | 280                   | 0.9957         | $y = 2768.1x + 42430$  |
| <b>4d</b>                | 2.11       | 350                   | 0.9911         | $y = 1740.3x - 3215.8$ |
| <b>4e</b>                | 2.47       | 450                   | 0.9935         | $y = 1989.9x + 44293$  |
| <b>4f</b>                | 3.16       | 490                   | 0.999          | $y = 2329.1x - 132872$ |

## 2. Supplementary Results

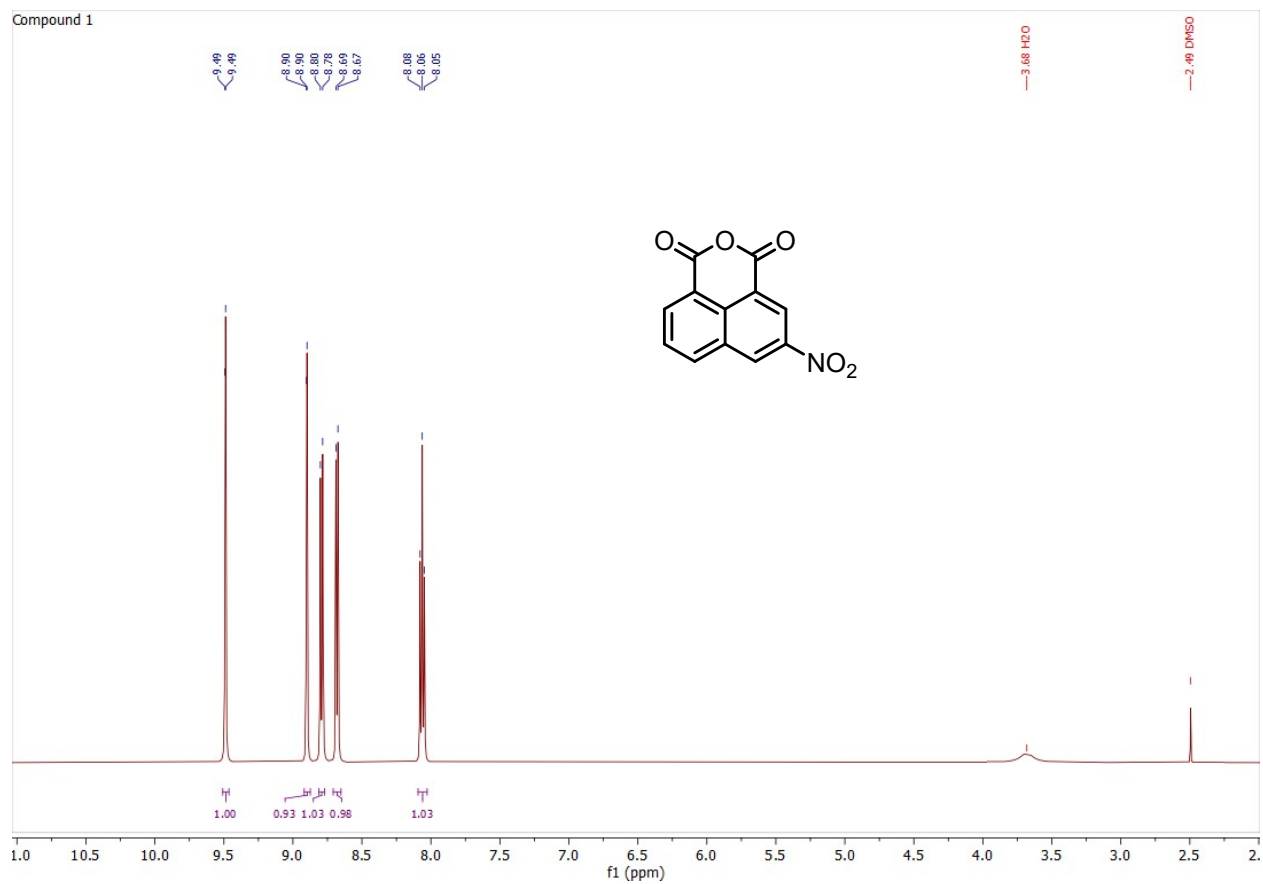

**Fig. S 1.**  $^1\text{H}$  NMR (500 MHz, DMSO) of 3-nitro-1,8-naphthalic anhydride (Compound 1)

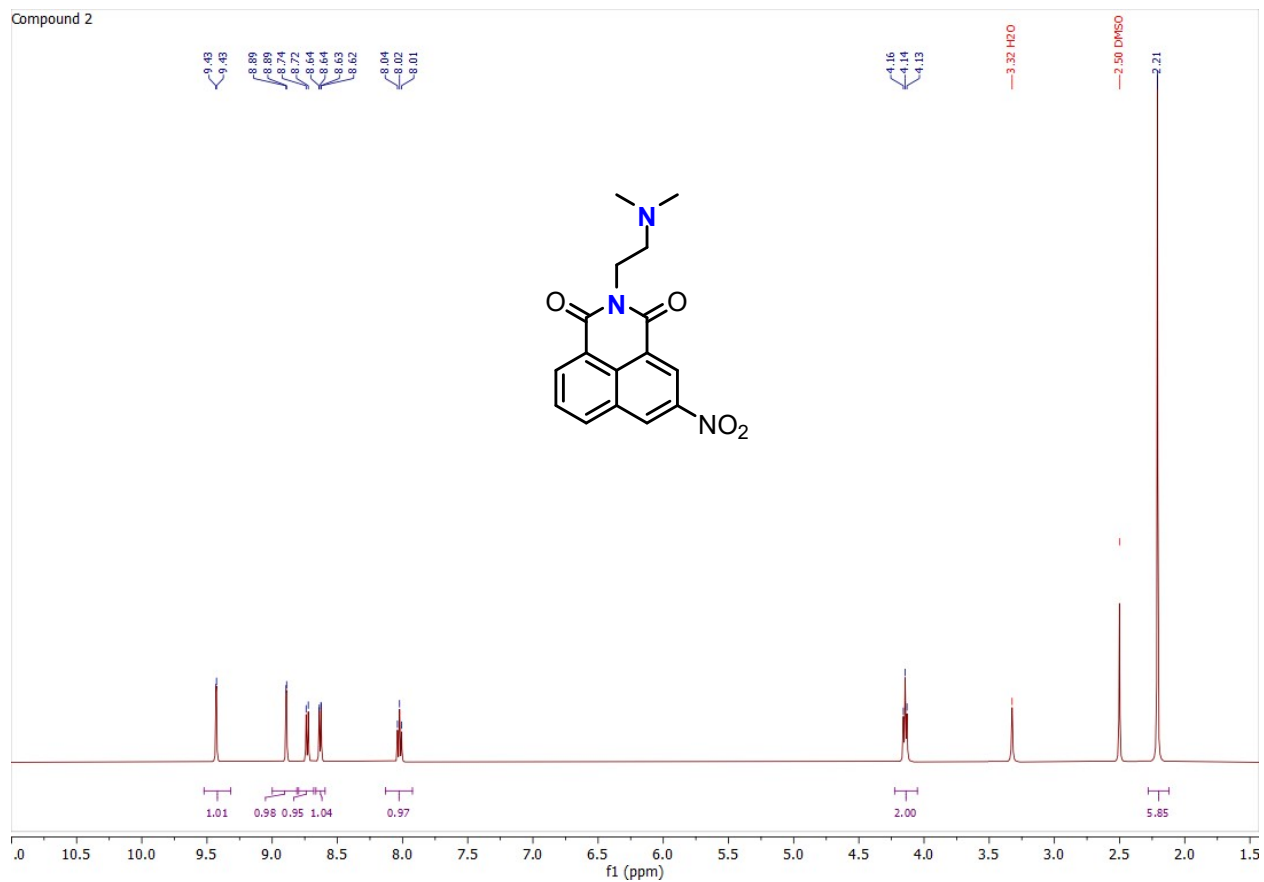

Fig. S 2. <sup>1</sup>H NMR (500 MHz, DMSO) of Mitonafide (Compound 2)

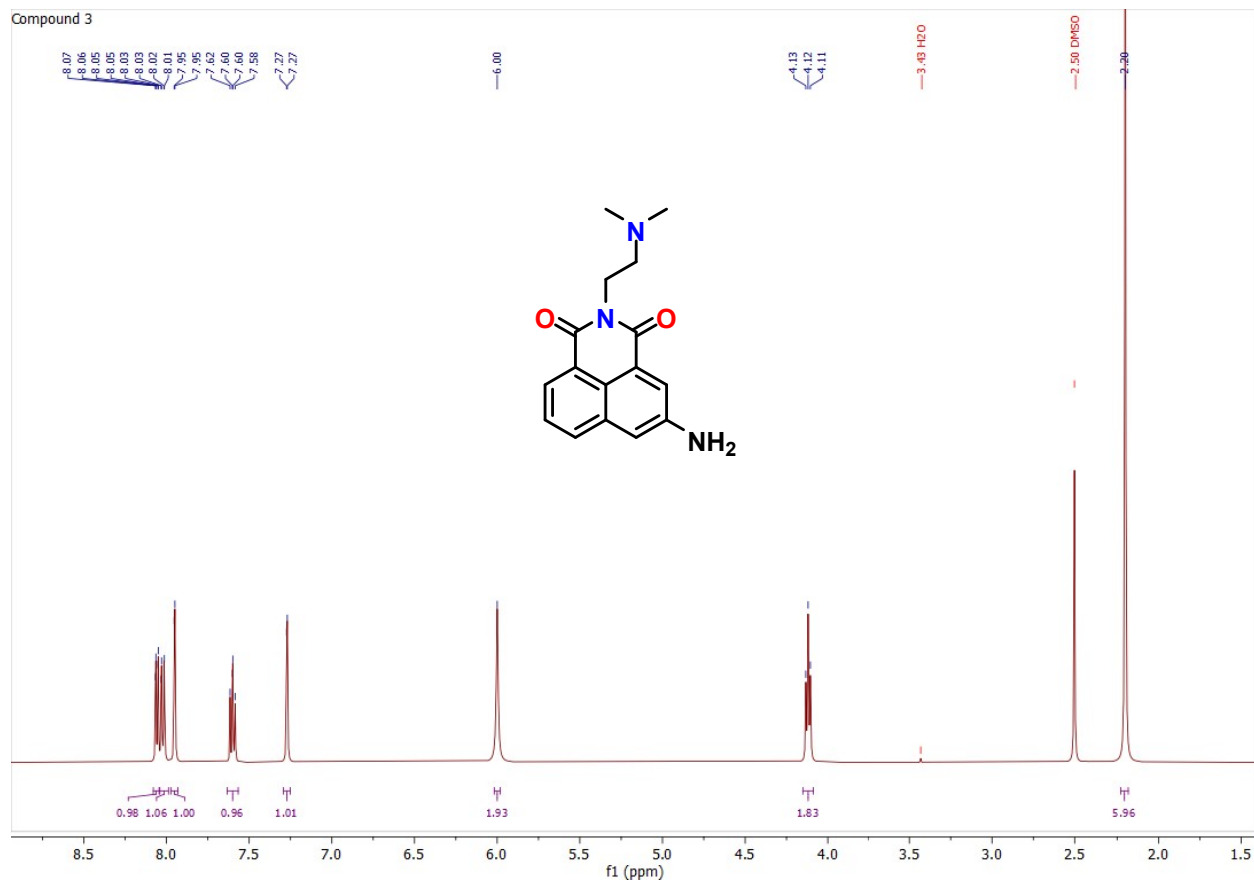

Fig. S 3.  $^1\text{H}$  NMR (500 MHz, DMSO) of Amonafide (Compound 3)

Compound 4a

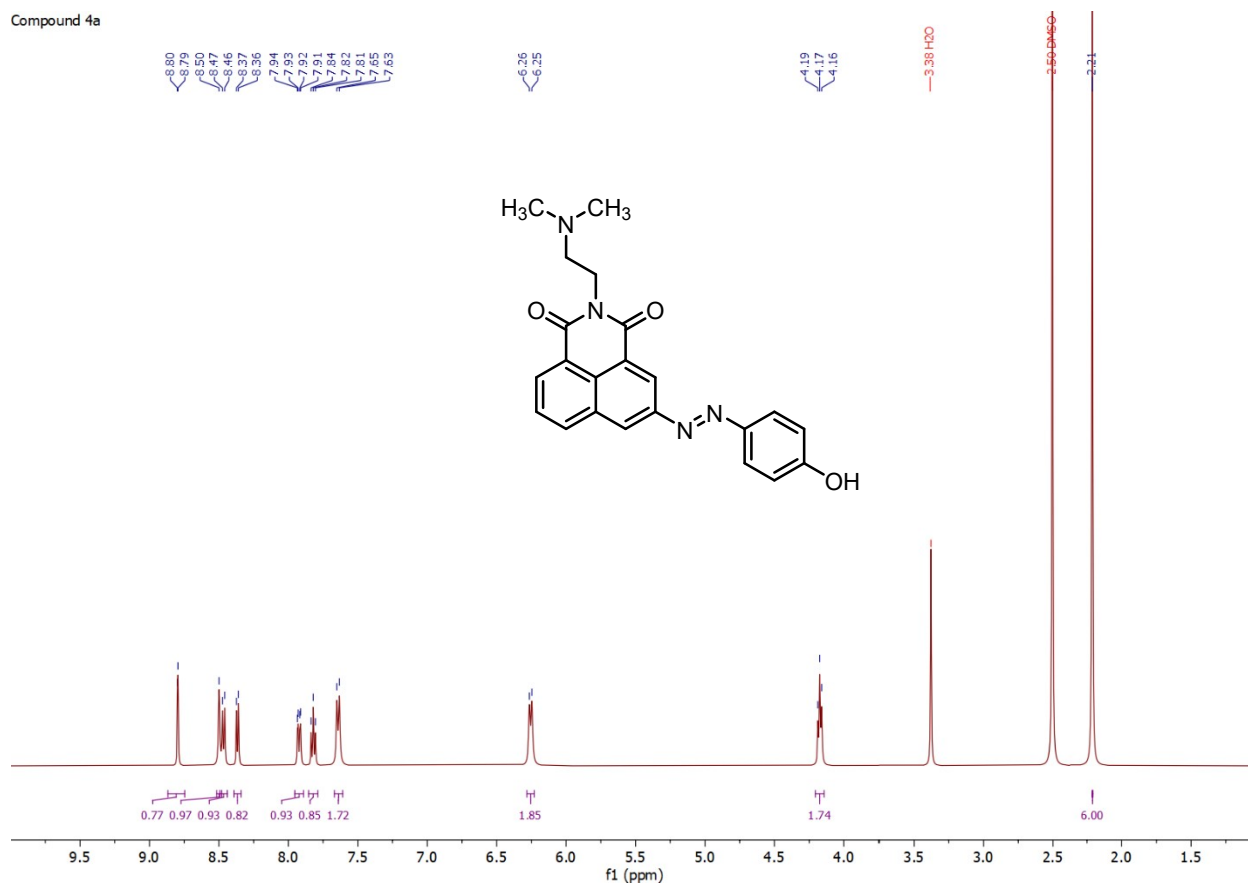

**Fig. S 4.** <sup>1</sup>H NMR (500 MHz, DMSO) of (E)-2-(2-(dimethylamino)ethyl)-5-((4-hydroxyphenyl)diazenyl)-1H-benzo[de]isoquinoline-1,3(2H)-dione (Compound 4a)

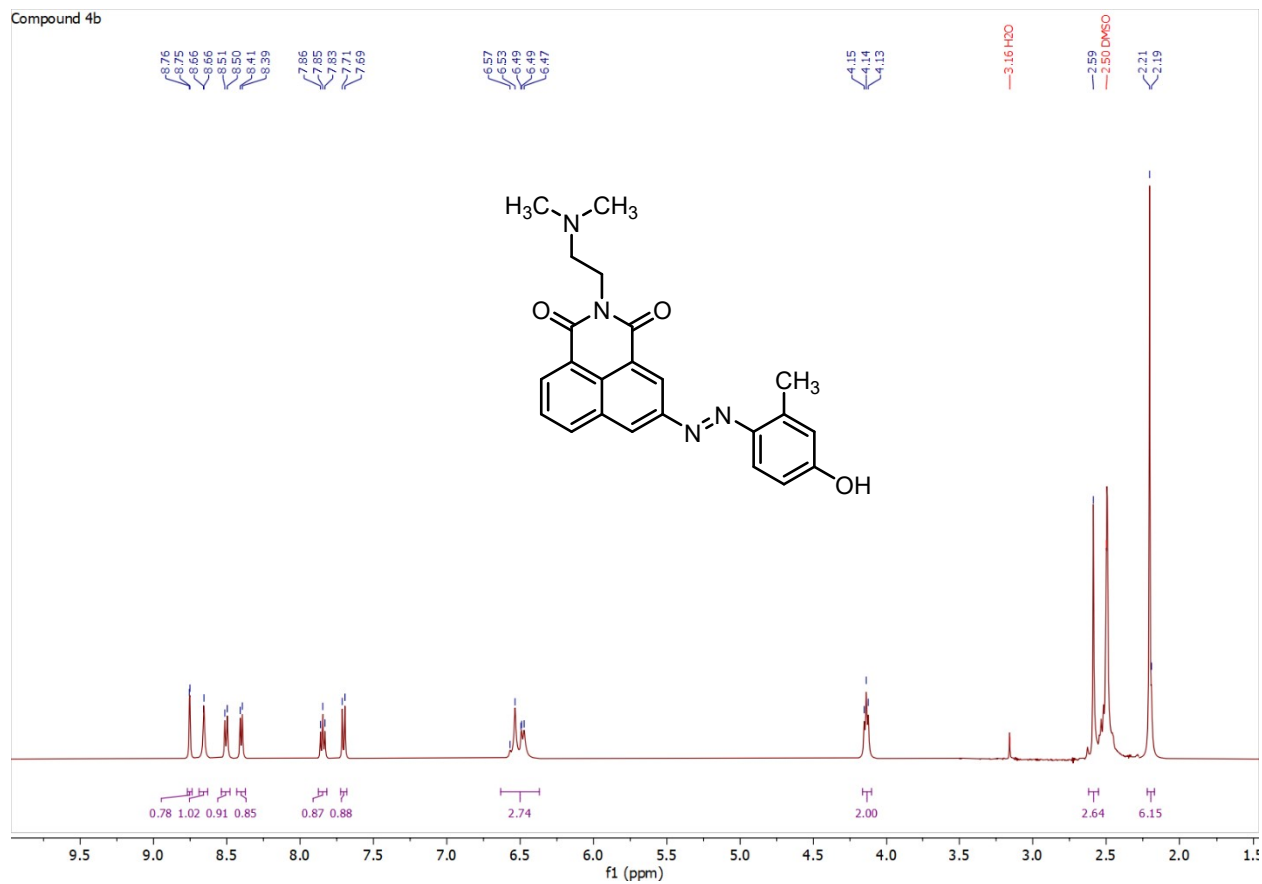

**Fig. S 5.** <sup>1</sup>H NMR (500 MHz, DMSO) of (E)-2-(2-(dimethylamino)ethyl)-5-((4-hydroxy-2-methylphenyl)diazenyl)-1H-benzo[de]isoquinoline-1,3(2H)-dione (Compound 4b)

Compound 4c

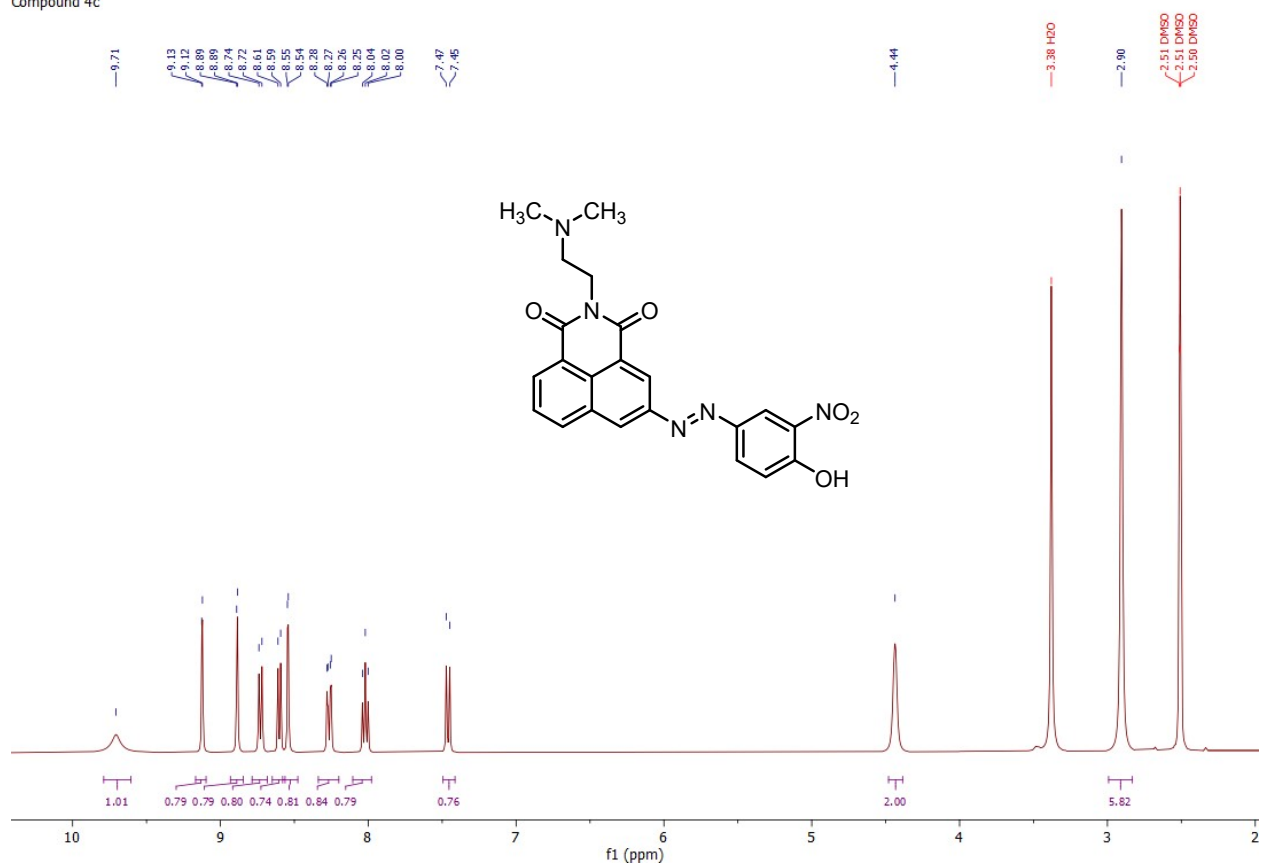

**Fig. S 6.** <sup>1</sup>H NMR (400 MHz, DMSO) of 3-(E)-2-(2-(dimethylamino)ethyl)-5-((4-hydroxy-3-nitrophenyl)diazenyl)-1H-benzo[de]isoquinoline-1,3(2H)-dione (Compound 4c)



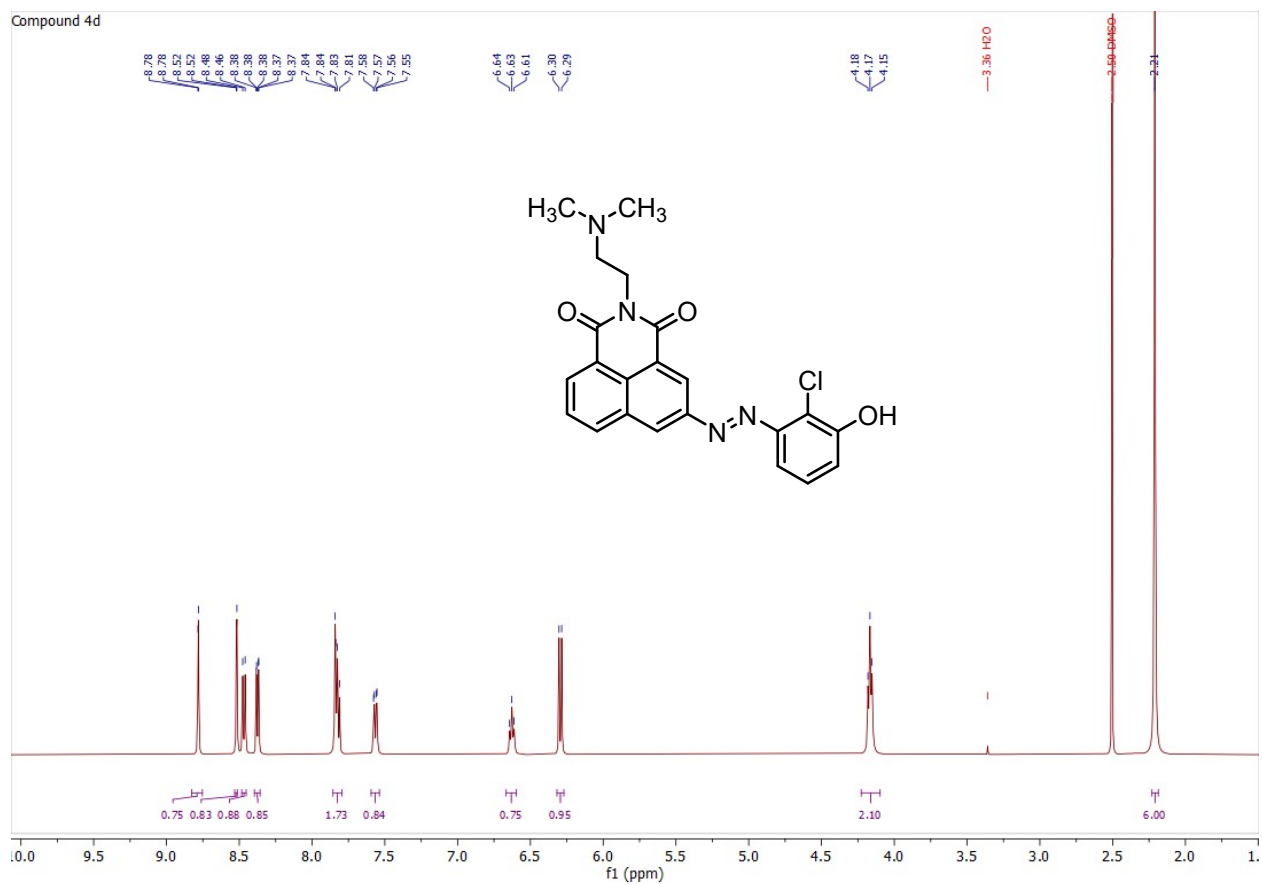

**Fig. S 7.** <sup>1</sup>H NMR (500 MHz, DMSO) of (E)-5-((3-chloro-4-hydroxyphenyl)diazenyl)-2-(2-(dimethylamino)ethyl)-1H-benzo[de]isoquinoline-1,3(2H)-dione (Compound 4d)

Compound 4e

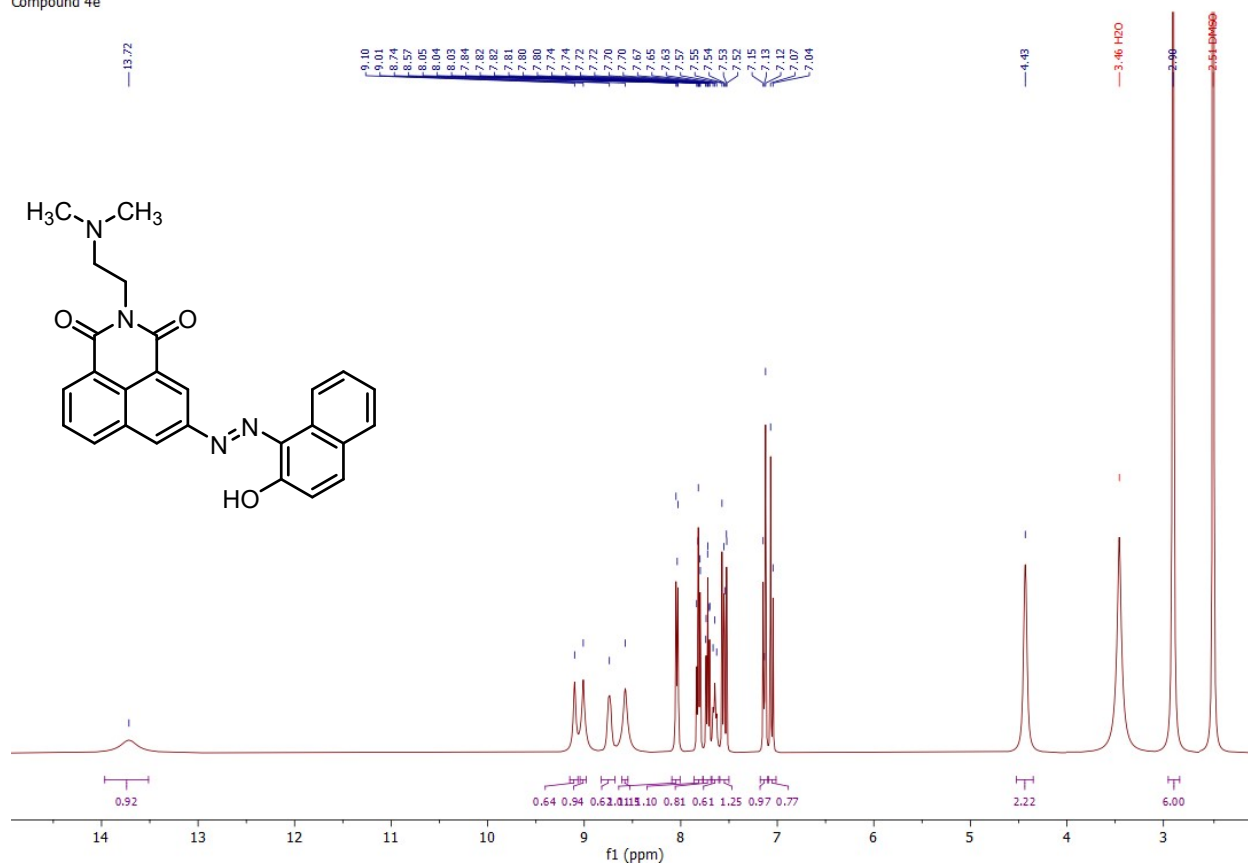

**Fig. S 8.** <sup>1</sup>H NMR (400 MHz, DMSO) of (E)-2-(2-(dimethylamino)ethyl)-5-((4-hydroxynaphthalen-2-yl)diazenyl)-1H-benzo[de]isoquinoline-1,3(2H)-dione (Compound 4e)

Compound 4f

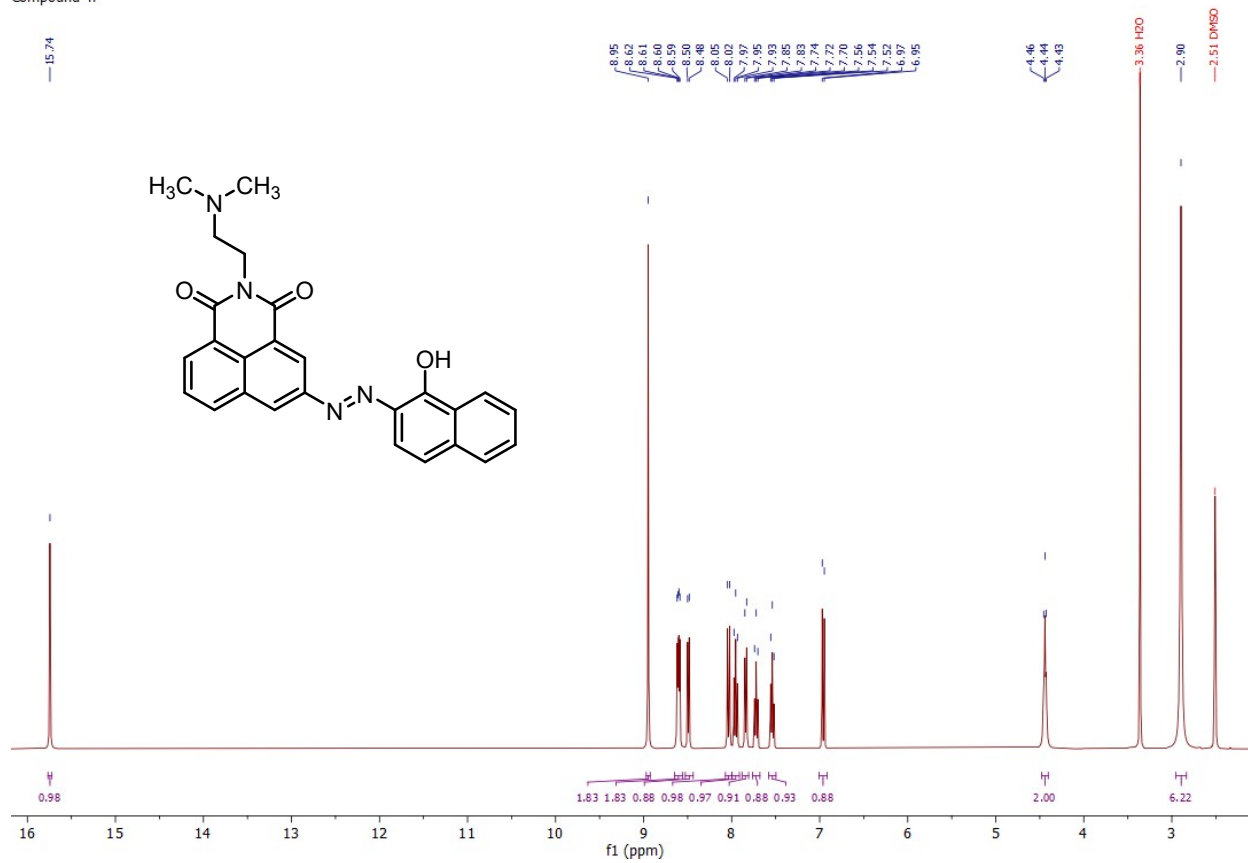

**Fig. S 9.** <sup>1</sup>H NMR (400 MHz, DMSO) of (E)-2-(2-(dimethylamino)ethyl)-5-((3-hydroxynaphthalen-1-yl)diazenyl)-1H-benzo[de]isoquinoline-1,3(2H)-dione (Compound 4f)

G(-0.5) PAMAM Dendrimer

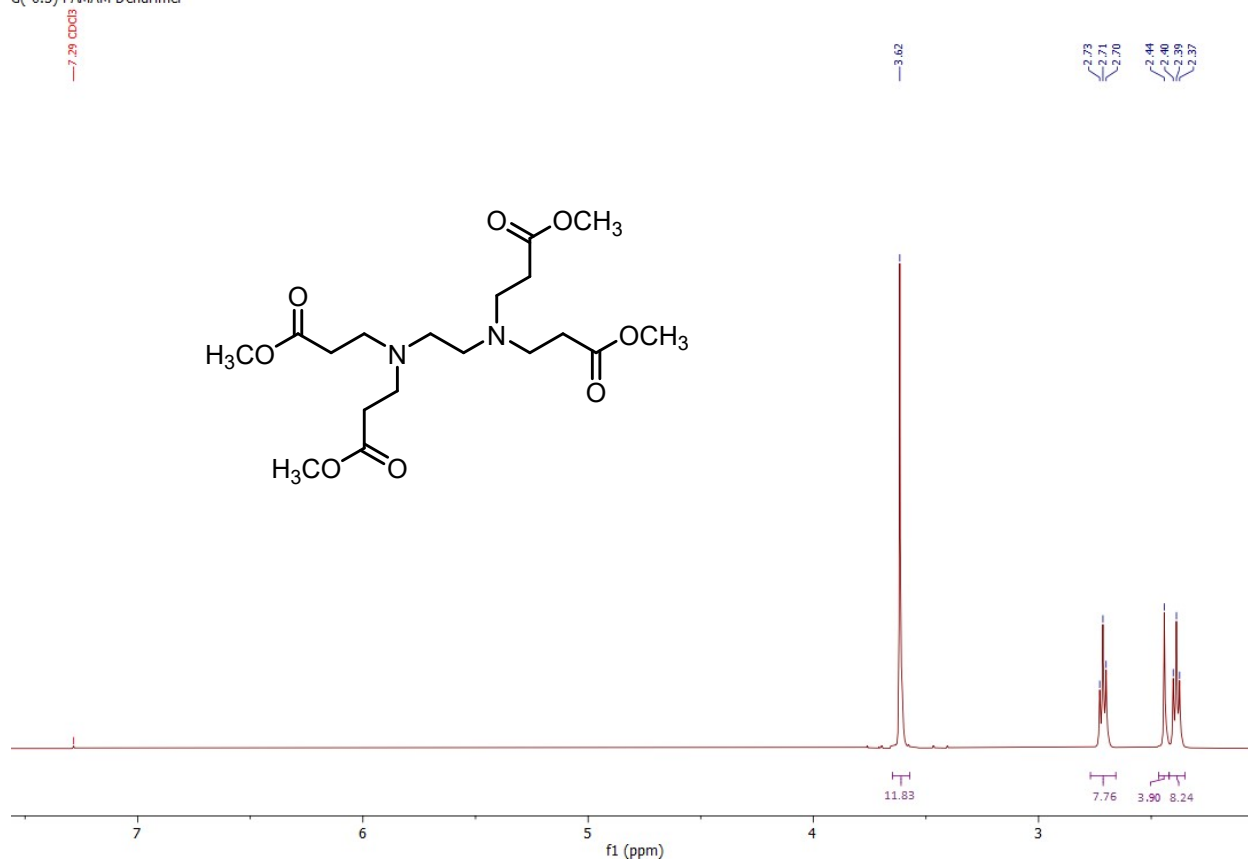

Fig. S 10.  $^1\text{H}$  NMR (500 MHz,  $\text{CDCl}_3$ ) of G(-0.5) PAMAM Dendrimer

G(-0.5) PAMAM Dendrimer

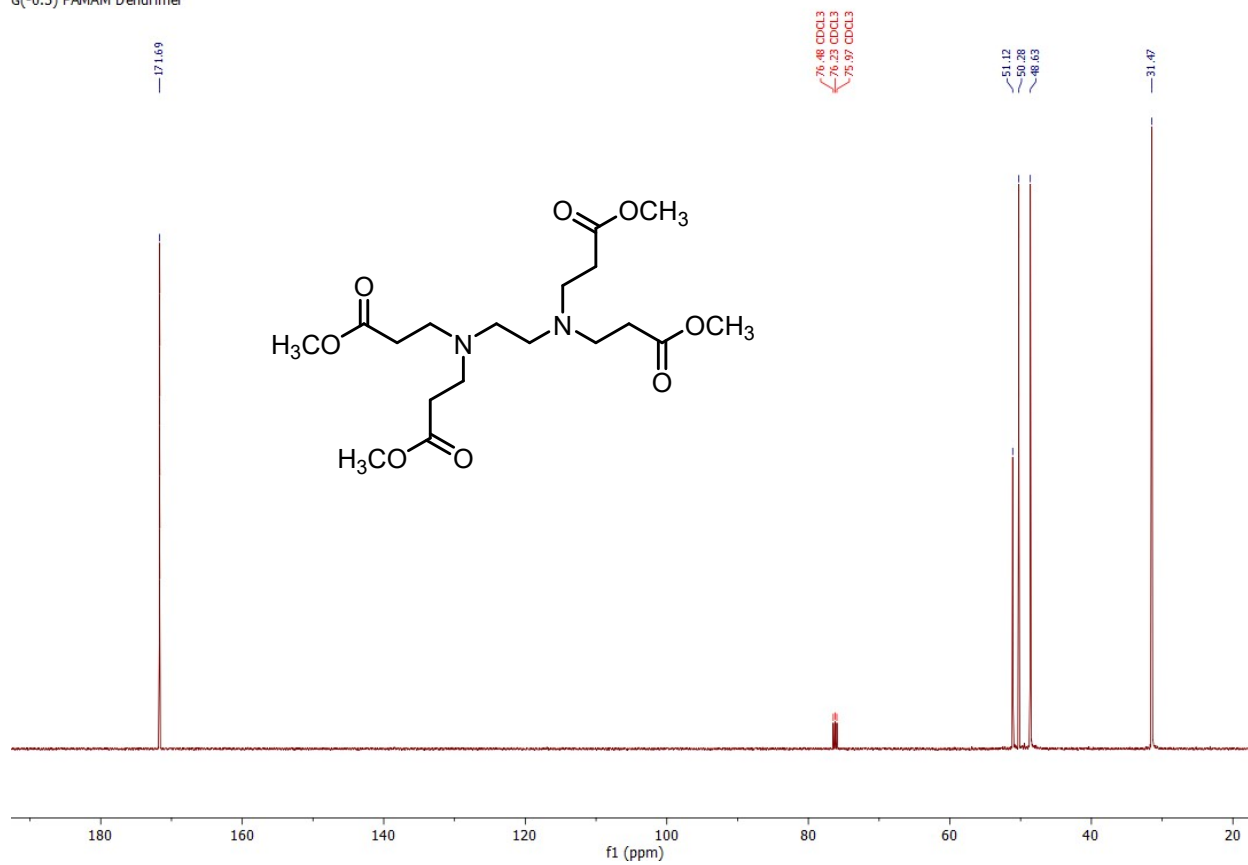

Fig. S 11.  $^{13}\text{C}$  NMR (500 MHz,  $\text{CDCl}_3$ ) of G(-0.5) PAMAM Dendrimer



G0 PAMAM Dendrimer

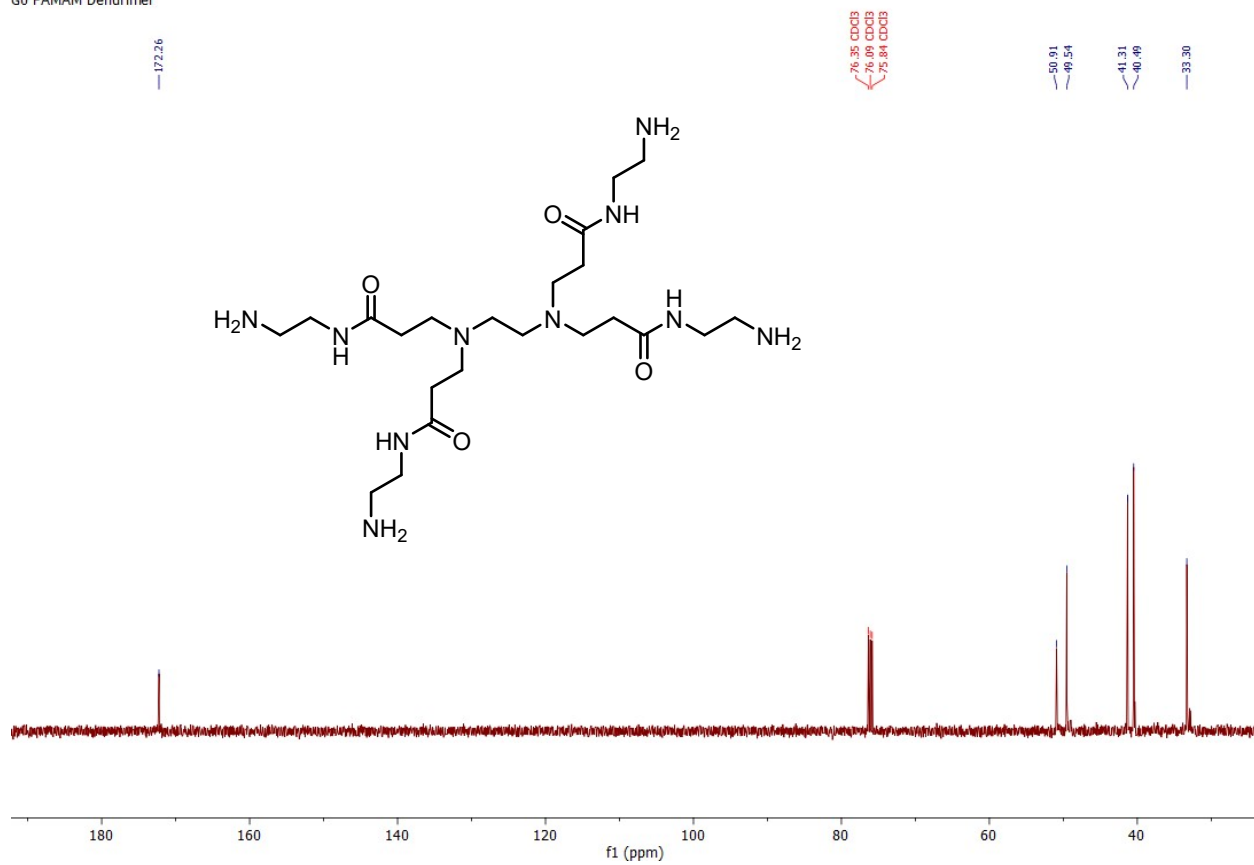

Fig. S 13. <sup>13</sup>C NMR (500 MHz, CDCl<sub>3</sub>) of G(0) PAMAM Dendrimer

G0.5 PAMAM Dendrimer

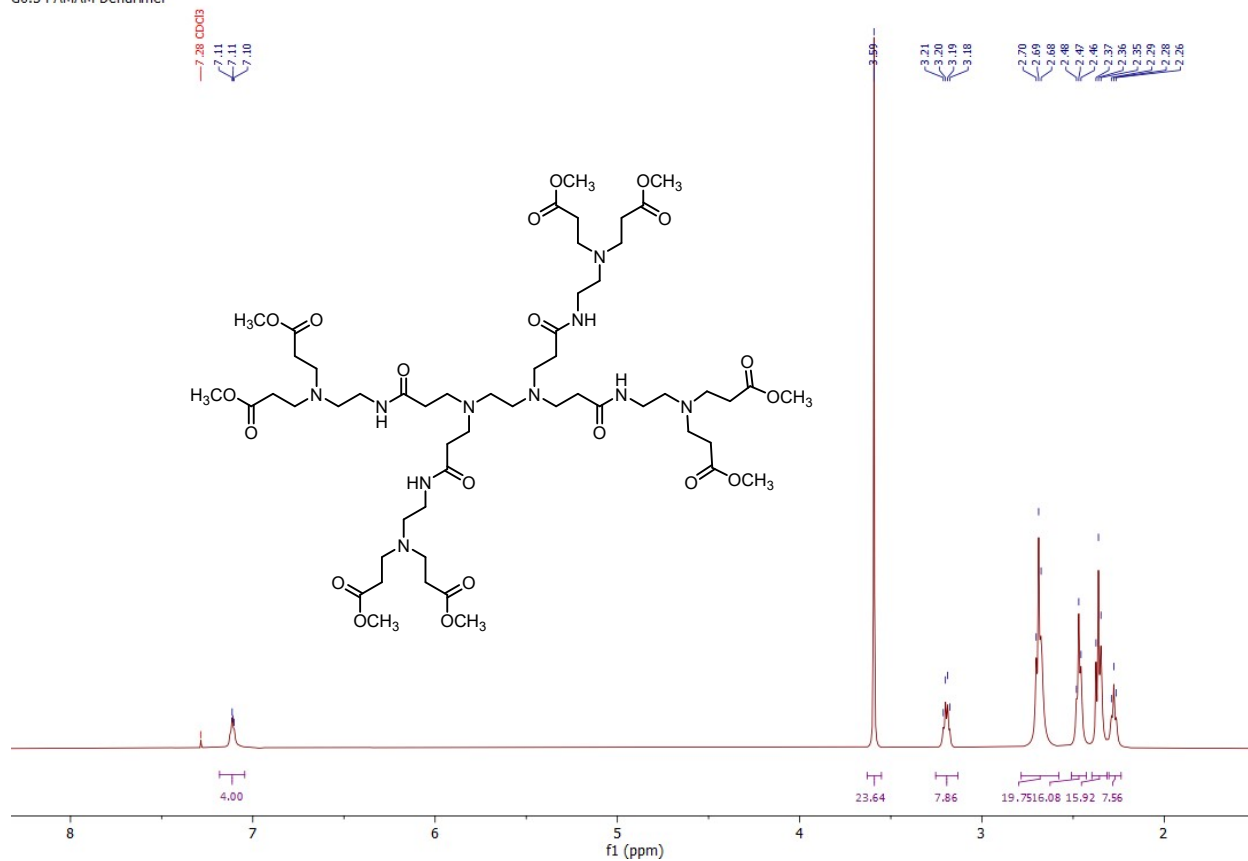

Fig. S 14. <sup>1</sup>H NMR (500 MHz, CDCl<sub>3</sub>) of G(0.5) PAMAM Dendrimer



G0.5 PAMAM Dendrimer

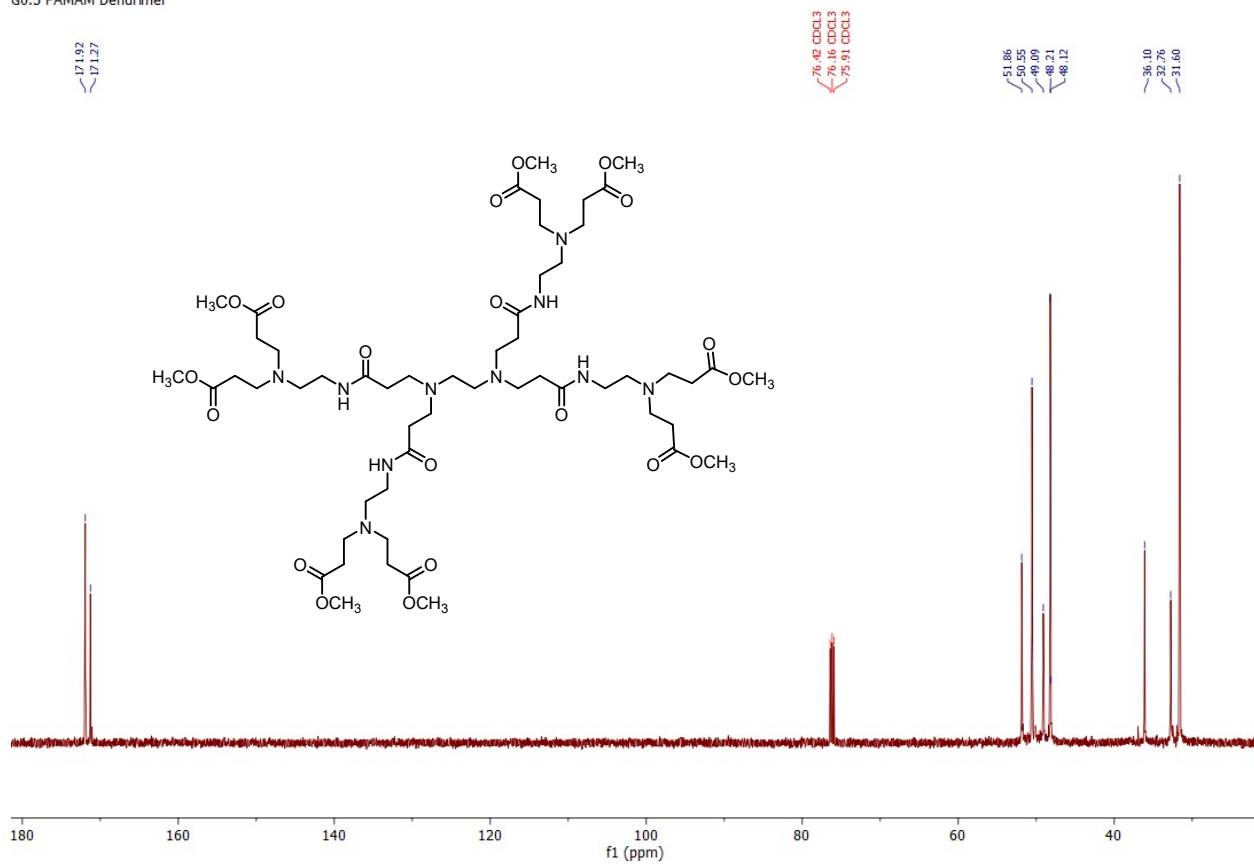

Fig. S 15. <sup>13</sup>C NMR (500 MHz, CDCl<sub>3</sub>) of G(0.5) PAMAM Dendrimer
